# Supplementary material for: Cyber security Awareness among Dental Healthcare workers in a tertiary hospital in North Western Nigeria
Source: Research Square preprint supplement (doi:10.21203/rs.3.rs-8474163/v1), 2026-01-19
Supplement: Supplementary file 1 [file 0c998d4456e34240360c6621.docx]

**Questionnaire on cybersecurity awareness among dental staff in UDUTH Sokoto.**

**Introduction for the Participant:**

*"Good day. My name is Abdurrazaq Taiwo. We are conducting a study on* **cybersecurity awareness among dental staff in UDUTH Sokoto***. This is a survey design to improve the cybersecurity of our institution. It is entirely anonymous and your information would not be exposed. Neither is there any penalty for negative feedback.*

*If you consent, kindly indicate. This will take about 20-25 minutes. Do you have any questions?"*

**Informed Consent Statement (To be signed electronically by the participant):**

I have read, or have had read to me, the information about this study.

I have had the opportunity to ask questions and all my questions have been answered to my satisfaction.

I understand that my participation is voluntary.

I voluntarily agree to take part in this study.

Participant's Name: _________________________

Date: _________________________

Researcher's Name: _________________________

**Section A: Demographic and Socio-Economic Information**

*Instructions: Please tick [✓] the appropriate box or write your answer in the space provided.*

1. **Age**: ______ (Years)

10-19

20-29

30-39

40-49

50-59

Other:

1. **Last name**

**......................**

1. **First name:**

**........................**

1. **Unit in Dental**:

[ ] Surgery

[ ] Conservative

[ ] Dental Therapy

[ ] Oral Diagnosis

[ ] Nursing

[ ] Health Records

[ ] Administrative

[ ] Laboratory

[ ] Other (Please specify): _______________

3. **Profession:**

[ ] Doctor

[ ] Nurse

[ ] Dental Therapist

[ ] Dental Technologist

[ ] Dental Technician/Assistant

[ ] Administrative Officer

[ ] Health Record Officer

[ ] Other

4. **Gender:**

[ ] Male

[ ] Female

[ ] Other

1. **Email:**

..................

**Section B: Cybersecurity knowledge and awareness**

1. **Which of the following is the most effective strategy for creating a strong password?" (Select all that apply)"**

[ ] Use a short, complex word with common substitutions (e.g., "P@ssw0rd").

[ ] Use a different password for each important account.

[ ] Use a personal information like your pet's name or birthday.

[ ] Use a mix of uppercase letters, lowercase letters, numbers, and symbols

[ ] Use a long phrase that is easy for you to remember

1. **Rate frequency: “I change my password regularly”**

1 2 3 4 5

3**.  "Rate your agreement with: 'I use a different password for each of my important accounts.'"**

Strongly Agree Agree Neutral Disagree Strongly Disagree Not Applicable

. [ ] [ ] [ ] [ ] [ ] [ ]

1. **How do you create and remember your passwords?" Rate each from 1 to 5 in order of preference**.
2. Memory 1 2 3 4 5

b. Written down 1 2 3 4 5

c. Password manager 1 2 3 4 5

1. **What prompts you to change your password?**

[ ] Mandatory reset

[ ] Breach News

[ ] A feeling it's time

[ ] Others

1. **Modern security best practices (from NIST) recommend not forcing regular password changes without cause. Instead, the focus is on: If you had to choose, True or False?**

a) Use long, unique pass phrases [ ] [ ]

b) Password manager [ ] [ ]

**c)** Enabling multi-factor authentication (MFA) **[ ] [ ]**

d) Changing passwords only if there is a suspicion of compromise [ ] [ ]

8. “If you received an unexpected email from ‘IT’ asking for your password, what would you do?

Strongly Agree Agree Neutral Disagree Strongly Disagree Not Applicable

1. Ignore and delete the email. [ ] [ ] [ ] [ ] [ ] [ ]
2. Reply to the email and tell them they are phishing. [ ] [ ] [ ] [ ] [ ] [ ]
3. Click the link in the email to "see what it is" but not enter any information. [ ] [ ] [ ] [ ] [ ] [ ]
4. Forward the email to the IT Help Desk or security team for verification. [ ] [ ] [ ] [ ] [ ] [ ]
5. Provide the information because it's from the "IT Department”. [ ] [ ] [ ] [ ] [ ] [ ]
6. Check the sender's full email address carefully for any slight[ ] [ ] [ ] [ ] [ ] [ ]

**Do you have any additional comments you might like to share?**________________________________________________________

_________________________________________________________

_________________________________________________________

End of Questionnaire

"Thank you so much for your time and for sharing your views with us. Your answers are very valuable. Do you have any final questions for me?"
